# Supplementary material
Source: PubMed Central journal article supplement (PMC6902165)
Supplement: jamadermatol-156-151-s001.pdf [file jamadermatol-156-151-s001.pdf]

## Supplementary Online Content

Dey AK, Gaddipati R, Elnabawi YA, et al. Association between soluble lectinlike oxidized low-density lipoprotein receptor-1 and coronary artery disease in psoriasis. *JAMA Dermatol*. Published online November 20, 2019. doi:10.1001/jamadermatol.2019.3595

**eTable.** Characteristics of psoriasis patients at baseline

This supplementary material has been provided by the authors to give readers additional information about their work.

**eTable. Characteristics of psoriasis patients at baseline.**

| Variable                                                | Psoriasis<br>(N=175)         |
|---------------------------------------------------------|------------------------------|
| <b>Demographic and clinical characteristics</b>         |                              |
| Age, years                                              | 49.7 ± 12.6 (47.84-51.61)    |
| Males                                                   | 96 (55)                      |
| Hypertension                                            | 49 (28)                      |
| Hyperlipidemia                                          | 78 (45)                      |
| Type-2 diabetes                                         | 18 (10)                      |
| Body mass index, kg/m <sup>2</sup>                      | 29.6 ± 6.0 (28.66-30.46)     |
| Current smoker                                          | 14 (8)                       |
| Statin use                                              | 55 (32)                      |
| <b>Clinical and lab values</b>                          |                              |
| Total cholesterol, mg/dL                                | 183.4 ± 37.1 (177.86-188.95) |
| HDL cholesterol, mg/dL                                  | 56.0 ± 17.2 (53.58-58.53)    |
| LDL cholesterol, mg/dL                                  | 102.9 ± 30.0 (98.49-107.38)  |
| Triglycerides, mg/dL                                    | 122.0 ± 74.3 (110.83-133.07) |
| Framingham risk score                                   | 2.0 (1.0-6.0)                |
| High sensitivity c-reactive protein, mg/L               | 2.0 (0.8-4.8)                |
| Soluble LOX1*, pg/mL                                    | 210.3 (110.9-336.2)          |
| <b>Psoriasis severity</b>                               |                              |
| Psoriasis area severity index score                     | 5.6 (3.0-9.2)                |
| Biologic treatment                                      | 37 (21)                      |
| <b>Coronary artery characterization</b>                 |                              |
| Non-calcified coronary burden, mm <sup>2</sup> (x100)   | 1.10 ± 0.45 (1.05-1.14)      |
| Dense-calcified coronary burden, mm <sup>2</sup> (x100) | 0.019 (0.006-0.063)          |

Values reported in the table as Mean ± SD (95% CI) or Median (IQR) for continuous data and N (%) for categorical data; \*LOX1: Lectin-like oxidized low-density lipoprotein receptor-1.
